# Supplementary material
Source: PubMed Central journal article supplement (PMC4630150)

Figure S1. One day old *Aedes aegypti* females (20) were injected with OEH (20 pmol) and one day later, yolk deposition in the oocytes of each ovary was measured. The 7 females with yolk present in oocytes are presented while females which had no oocytes with yolk in oocytes are not. To the right are micrographs showing the ovaries from two of the females that were injected with OEH. Note that the amount of yolk in oocytes within each ovary pair is very uniform.

| Oocyte # | Female 1 |         | Female 2 |         | Female 3 |         | Female 4 |         | Female 5 |         | Female 6 |         | Female 7 |         |
|----------|----------|---------|----------|---------|----------|---------|----------|---------|----------|---------|----------|---------|----------|---------|
|          | Ovary A  | Ovary B |
| 1        | 80       | 60      | 80       | 60      | 60       | 40      | 60       | 60      | 100      | 0       | 60       | 60      | 60       | 60      |
| 2        | 0        | 60      | 60       | 60      | 0        | 0       | 60       | 60      | 20       | 60      | 0        | 60      | 60       | 60      |
| 3        | 60       | 60      | 60       | 60      | 0        | 0       | 60       | 60      | 80       | 100     | 60       | 0       | 60       | 60      |
| 4        | 80       | 60      | 40       | 0       | 0        | 0       | 60       | 60      | 40       | 100     | 60       | 0       | 0        | 60      |
| 5        | 60       | 60      | 60       | 0       | 0        | 0       | 60       | 60      | 60       | 100     | 60       | 60      | 60       | 0       |
| 6        | 60       | 40      | 60       | 60      | 60       | 60      | 60       | 60      | 80       | 80      | 60       | 40      | 60       | 60      |
| 7        | 60       | 40      | 60       | 60      | 60       | 60      | 60       | 60      | 80       | 100     | 60       | 40      | 40       | 60      |
| 8        | 60       | 60      | 60       | 60      | 0        | 40      | 60       | 60      | 100      | 100     | 60       | 60      | 60       | 60      |
| 10       | 40       | 60      | 40       | 60      | 0        | 0       | 60       | 40      | 100      | 0       | 60       | 60      | 60       | 60      |
| 11       | 80       | 60      | 40       | 60      | 60       | 0       | 60       | 40      | 100      | 60      | 40       | 60      | 60       | 60      |
| 12       | 60       | 60      | 40       | 60      | 40       | 0       | 60       | 0       | 80       | 80      | 60       | 60      | 60       | 60      |
| 13       | 60       | 40      | 40       | 0       | 60       | 60      | 40       | 60      | 80       | 60      | 60       | 60      | 60       | 60      |
| 14       | 60       | 60      | 0        | 60      | 60       | 60      | 40       | 40      | 60       | 100     | 60       | 60      | 40       | 60      |
| 15       | 60       | 80      | 60       | 60      | 40       | 40      | 60       | 40      | 60       | 100     | 100      | 60      | 40       | 60      |
| 16       | 60       | 60      | 80       | 40      | 0        | 60      | 40       | 60      | 60       | 100     | 40       | 60      | 60       | 60      |
| 17       | 60       | 60      | 60       | 40      | 60       | 60      | 40       | 60      | 60       | 100     | 60       | 60      | 60       | 60      |
| 18       | 60       | 40      | 60       | 60      | 60       | 40      | 40       | 60      | 100      | 100     | 60       | 60      | 0        | 40      |
| 19       | 60       | 60      | 60       | 60      | 0        | 40      | 40       | 60      | 100      | 80      | 60       | 60      | 60       | 80      |
| 20       | 40       | 60      | 80       | 60      | 60       | 60      | 0        | 40      | 100      | 100     | 60       | 0       | 60       | 60      |
| 21       | 40       | 60      | 60       | 60      | 60       | 60      | 0        | 40      | 80       | 80      | 60       | 0       | 60       | 60      |
| 22       | 40       | 60      | 60       | 60      | 40       | 60      | 80       | 80      | 80       | 100     | 40       | 60      | 60       | 60      |
| 23       | 40       | 20      | 60       | 40      | 60       | 0       | 60       | 60      | 100      | 100     | 40       | 60      | 60       | 60      |
| 24       | 40       | 60      | 40       | 60      | 60       | 0       | 60       | 60      | 100      | 100     | 0        | 60      | 40       | 60      |
| 25       | 60       | 60      | 0        | 60      | 60       | 0       | 80       | 40      | 100      | 80      | 0        | 40      | 40       | 60      |
| 26       | 60       | 60      | 60       | 40      | 60       | 60      | 40       | 60      | 60       | 80      | 60       | 40      | 60       | 0       |
| 27       | 60       | 60      | 60       | 40      | 40       | 60      | 60       | 60      | 100      | 100     | 60       | 60      | 60       | 60      |
| 28       | 60       | 60      | 60       | 0       | 40       | 60      | 60       | 60      | 100      | 100     | 40       | 60      | 60       | 60      |
| 30       | 40       | 80      | 60       | 0       | 60       | 40      | 60       | 40      | 100      | 100     | 60       | 60      | 60       | 60      |
| 31       | 40       | 60      | 60       | 60      | 0        | 40      | 60       | 40      | 100      | 60      | 60       | 60      | 40       | 60      |
| 32       | 40       | 80      | 60       | 60      | 60       | 60      | 60       | 40      | 100      | 100     | 40       | 60      | 40       | 60      |
| 33       | 0        | 60      | 60       | 20      | 60       | 60      | 60       | 60      | 80       | 100     | 60       | 0       | 60       | 60      |
| 34       | 60       | 60      | 60       | 60      | 0        | 60      | 0        | 60      | 60       | 0       | 60       | 0       | 60       | 60      |
| 34       | 60       | 40      | 60       | 60      | 60       | 60      | 0        | 60      | 80       | 80      | 60       | 60      | 0        | 60      |
| 35       | 60       | 40      | 60       | 40      | 60       | 80      | 60       | 60      | 100      | 100     | 20       | 60      | 0        | 60      |
| 36       | 60       | 60      | 60       | 40      | 60       | 60      | 60       | 60      | 100      | 100     | 0        | 80      | 0        | 60      |
| 37       | 60       | 60      | 60       | 0       | 40       | 60      | 40       | 40      | 80       | 100     | 60       | 60      | 60       | 60      |
| 39       | 0        | 60      | 0        | 0       | 60       | 60      | 60       | 0       | 100      | 0       | 60       | 60      | 60       | 60      |
| 40       | 40       | 60      | 40       | 60      | 60       | 60      | 60       | 0       | 100      | 80      | 80       | 40      | 60       | 0       |
| 41       | 80       | 60      | 60       | 60      | 60       | 40      | 0        | 60      | 80       | 100     | 60       | 0       | 60       | 0       |
| 42       | 60       | 60      | 60       | 60      | 40       | 40      | 60       | 60      | 80       | 100     | 60       | 0       | 60       | 60      |
| 43       | 60       | 60      | 60       | 40      | 60       | 40      | 60       | 60      | 100      | 80      | 60       | 40      | 60       | 60      |
| 44       | 60       | 0       | 60       | 60      | 60       | 60      | 60       | 60      | 100      | 80      | 0        | 0       | 60       | 60      |
| 45       | 80       | 60      | 0        | 60      | 40       | 0       | 60       | 60      | 100      | 100     | 60       | 0       | 60       | 60      |
| 46       | 40       | 60      | 60       | 60      | 40       | 0       | 60       | 40      | 80       | 100     | 60       | 40      | 60       | 60      |
| 47       | 60       | 60      | 60       | 60      | 40       | 60      | 60       | 40      | 80       | 100     | 60       | 60      | 60       | 60      |
| 48       | 60       | 60      | 60       | 60      | 0        | 60      | 60       | 40      | 100      | 100     | 60       | 60      | 40       | 60      |
| 49       | 60       | 80      | 60       | 40      | 40       | 60      | 60       | 40      | 60       | 0       | 80       | 60      | 20       | 60      |
| 50       | 60       | 40      | 60       | 60      | 40       | 60      | 60       | 40      | 60       | 60      | 60       | 60      | 60       | 0       |
| 51       | 60       | 60      | 60       | 60      | 60       | 60      | 60       | 60      | 0        | 100     | 40       | 60      | 60       | 0       |
| 52       | 60       | 60      | 60       | 60      | 80       | 40      | 60       | 60      | 100      | 40      | 60       | 60      | 60       | 0       |
| 53       | 60       | 60      | 60       | 60      | 60       | 40      | 60       | 60      | 80       | 40      | 60       | 40      | 60       | 60      |
| 54       | 60       | 60      | 60       | 60      | 60       | 60      | 0        | 60      | 0        | 60      | 0        | 60      | 60       | 60      |
| 55       | 60       | 60      | 60       | 60      | 60       | 60      | 0        | 60      | 60       | 60      | 60       | 60      | 60       | 60      |
| 56       | 60       | 60      | 60       | 60      | 60       | 60      | 0        | 60      | 60       | 60      | 60       | 60      | 60       | 60      |
| 57       | 60       | 60      | 60       | 60      | 60       | 60      | 40       | 60      | 60       | 60      | 60       | 60      | 60       | 60      |
| 58       | 40       | 60      | 60       | 60      | 60       | 60      | 40       | 60      | 60       | 60      | 60       | 60      | 60       | 60      |
| 59       | 40       | 60      | 60       | 60      | 60       | 60      | 0        | 60      | 60       | 60      | 60       | 60      | 60       | 60      |
| 60       | 40       | 60      | 60       | 60      | 60       | 60      | 0        | 60      | 60       | 60      | 60       | 60      | 60       | 60      |
| 61       | 60       | 60      | 60       | 60      | 60       | 60      | 0        | 60      | 60       | 60      | 60       | 60      | 60       | 60      |
| 62       | 60       | 60      | 60       | 60      | 60       | 60      | 0        | 60      | 60       | 60      | 60       | 60      | 60       | 60      |

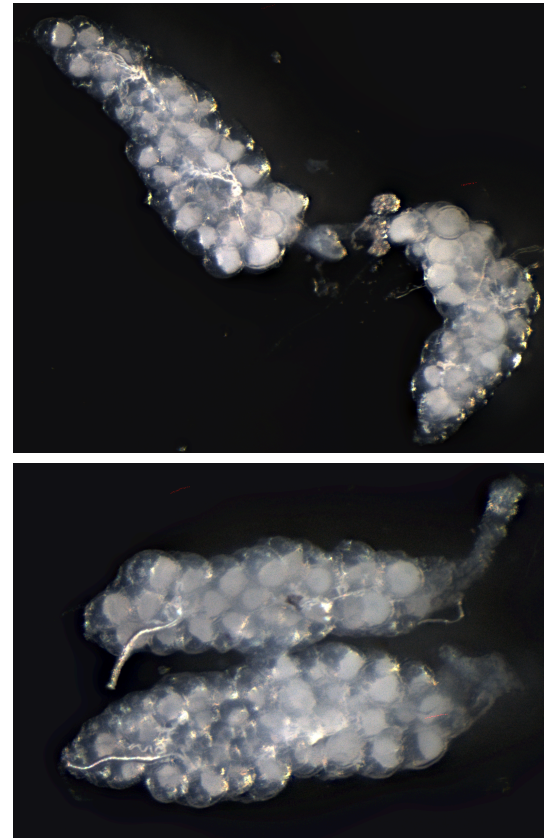

Supplement: NIHMS718035-supplement-1.pdf [file NIHMS718035-supplement-1.pdf]
