# Supplementary material
Source: PubMed Central journal article supplement (PMC4630150)

Figure S2. One day old *Aedes aegypti* females (17) were injected with OEH (20 pmol) and five days later, yolk deposition in the oocytes of each ovary was measured. The results for 14 of the females in the sample is presented below. Oocytes per female containing yolk are shown while oocytes with no yolk deposition were not counted. Below the data is shown micrographs of the ovaries for females 3, 4 and 12. Note the large amount of yolk in a few oocytes for females 3 and 12 while other oocytes contain no yolk. In contrast, female 4 contains a larger number of oocytes with yolk but the amount of yolk per oocyte is smaller.

Yolk deposition ( $\mu\text{m}$ ) in each oocyte in the ovaries of OEH injected female

| Oocyte # | Female 1 |         | Female 2 |         | Female 3 |         | Female 4 |         | Female 5 |         | Female 6 |         | Female 7 |         | Female 8 |         | Female 9 |         | Female 10 |         | Female 11 |         | Female 12 |         | Female 13 |         | Female 14 |         |
|----------|----------|---------|----------|---------|----------|---------|----------|---------|----------|---------|----------|---------|----------|---------|----------|---------|----------|---------|-----------|---------|-----------|---------|-----------|---------|-----------|---------|-----------|---------|
|          | Ovary A  | Ovary B | Ovary A   | Ovary B | Ovary A   | Ovary B | Ovary A   | Ovary B | Ovary A   | Ovary B | Ovary A   | Ovary B |
| 1        | 400      | 300     | 320      | 340     | 400      | 400     | 100      | 100     | 400      | 400     | 400      | 400     | 320      | 380     | 400      | 400     | 380      | 380     | 380       | 380     | 400       | 400     | 400       | 400     | 400       | 400     | 200       | 300     |
| 2        | 400      | 300     | 320      | 140     | 400      | 400     | 100      | 100     | 400      | 400     | 400      | 400     | 400      | 320     | 380      | 400     | 400      | 380     | 380       | 380     | 400       | 400     | 400       | 400     | 400       | 400     | 200       | 200     |
| 3        | 400      | 400     | 80       |         | 400      | 400     | 100      | 100     | 400      | 400     | 400      | 400     | 400      | 380     | 400      | 400     | 380      | 380     | 380       | 160     | 400       | 400     | 400       | 400     | 400       | 100     | 200       |         |
| 4        | 400      | 400     |          |         | 400      | 400     | 100      | 100     | 400      | 400     | 400      | 400     | 400      |         | 400      | 400     | 380      |         |           |         | 400       | 400     |           |         |           | 50      | 100       |         |
| 5        |          | 400     |          |         | 400      | 400     | 100      | 100     | 400      | 400     | 400      | 400     | 400      |         | 180      | 400     | 400      |         |           |         | 400       | 400     |           |         |           | 50      | 50        |         |
| 6        |          | 400     |          |         | 400      | 400     | 100      | 100     | 400      | 400     | 400      | 400     | 120      |         |          | 400     | 400      |         |           |         |           | 400     |           |         |           | 50      | 50        |         |
| 7        |          |         |          |         | 400      | 400     | 100      | 100     | 400      | 400     | 400      | 400     | 400      |         |          | 400     | 400      |         |           |         |           | 400     |           |         |           | 50      | 50        |         |
| 8        |          |         |          |         | 400      | 400     | 100      | 100     | 400      | 400     | 400      | 400     | 400      |         |          | 400     | 400      |         |           |         |           | 400     |           |         |           | 50      | 50        |         |
| 9        |          |         |          |         | 400      | 400     | 100      | 100     | 400      | 400     | 400      | 400     | 400      |         |          | 400     | 400      |         |           |         |           | 400     |           |         |           | 50      | 50        |         |
| 10       |          |         |          |         |          |         | 100      | 100     | 400      | 400     | 400      | 400     | 400      |         |          | 400     | 400      |         |           |         |           | 400     |           |         |           | 50      | 50        |         |
| 11       |          |         |          |         |          |         | 100      | 100     | 400      | 400     | 400      | 400     | 400      |         |          | 200     | 200      |         |           |         |           | 400     |           |         |           | 50      | 50        |         |
| 12       |          |         |          |         |          |         | 100      | 100     | 400      | 400     | 400      | 400     | 400      |         |          | 200     | 200      |         |           |         |           | 400     |           |         |           | 50      | 50        |         |
| 13       |          |         |          |         |          |         | 100      | 100     | 400      | 400     | 400      | 400     | 400      |         |          | 200     | 200      |         |           |         |           | 400     |           |         |           | 50      | 50        |         |
| 14       |          |         |          |         |          |         | 100      | 100     | 400      | 400     | 400      | 400     | 400      |         |          | 200     | 200      |         |           |         |           | 400     |           |         |           | 50      | 50        |         |
| 15       |          |         |          |         |          |         | 100      | 100     | 400      | 400     | 400      | 400     | 400      |         |          | 200     | 200      |         |           |         |           | 400     |           |         |           | 50      | 50        |         |
| 16       |          |         |          |         |          |         | 100      | 100     | 400      | 400     | 400      | 400     | 400      |         |          | 200     | 200      |         |           |         |           | 400     |           |         |           | 50      | 50        |         |
| 17       |          |         |          |         |          |         | 100      | 80      | 400      | 400     | 400      | 400     | 400      |         |          | 200     | 200      |         |           |         |           | 400     |           |         |           | 50      | 50        |         |
| 18       |          |         |          |         |          |         | 100      | 80      | 400      | 400     | 400      | 400     | 400      |         |          | 200     | 200      |         |           |         |           | 400     |           |         |           | 50      | 50        |         |
| 19       |          |         |          |         |          |         | 100      | 80      | 400      | 400     | 400      | 400     | 400      |         |          | 200     | 200      |         |           |         |           | 400     |           |         |           | 50      | 50        |         |
| 20       |          |         |          |         |          |         | 100      | 80      | 400      | 400     | 400      | 400     | 400      |         |          | 200     | 200      |         |           |         |           | 400     |           |         |           | 50      | 50        |         |
| 22       |          |         |          |         |          |         | 80       | 80      | 400      | 400     | 400      | 400     | 400      |         |          | 200     | 200      |         |           |         |           | 400     |           |         |           | 50      | 50        |         |
| 23       |          |         |          |         |          |         | 80       | 80      | 400      | 400     | 400      | 400     | 400      |         |          | 200     | 200      |         |           |         |           | 400     |           |         |           | 50      | 50        |         |
| 24       |          |         |          |         |          |         | 80       | 80      | 400      | 400     | 400      | 400     | 400      |         |          | 200     | 200      |         |           |         |           | 400     |           |         |           | 50      | 50        |         |
| 25       |          |         |          |         |          |         | 80       | 80      | 400      | 400     | 400      | 400     | 400      |         |          | 200     | 200      |         |           |         |           | 400     |           |         |           | 50      | 50        |         |
| 26       |          |         |          |         |          |         | 80       | 80      | 400      | 400     | 400      | 400     | 400      |         |          | 200     | 200      |         |           |         |           | 400     |           |         |           | 50      | 50        |         |

Female 3 ovaries

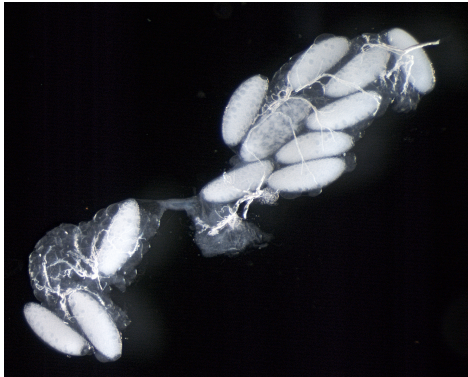

Female 4 ovaries

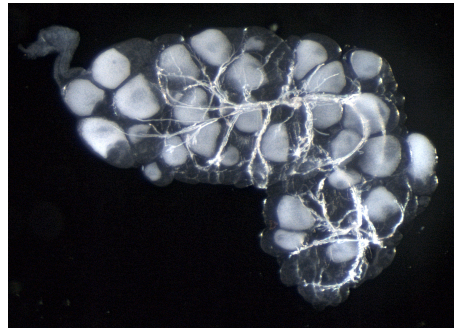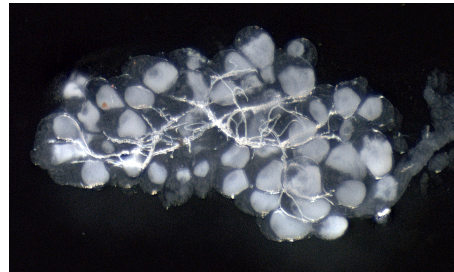

Female 12 ovaries

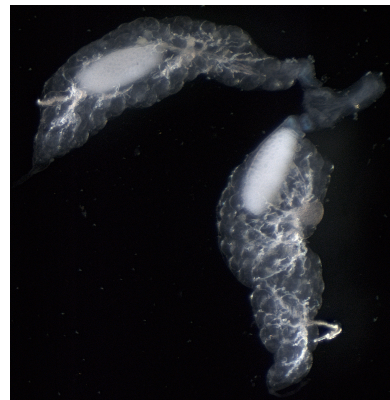

Supplement: NIHMS718035-supplement-2.pdf [file NIHMS718035-supplement-2.pdf]
